# Supplementary material
Source: HighWire-hosted journal article supplement (https://bmjopen.bmj.com/content/11/12/e048123)
Supplement: inline-supplementary-material-2 [file inline-supplementary-material-2.pdf]

## Questions for Wave 1

**What is your current marital or relationship status?**

Married/In a civil partnership  
Living as Married  
Separated/Divorced  
Widowed  
Never married

**Which of these applies to you?**

Working full time  
Working part time  
Full time student  
Retired  
Unemployed  
Not working/Other

**Are you the parent/ guardian of children of any of the following ages? (Please select all that apply.)**

Not parent/ guardian  
4 years and under  
5 to 11 years  
12 to 16 years  
17 to 18 years  
18 years and under  
Over 18 years

**Children in Household (Please select all that apply.)**

0  
1  
2  
3+  
Refuse to answer

**LMC\_Q1. The 2019 novel coronavirus (2019-nCoV), otherwise known as COVID-19, is an infectious disease first identified in the city of Wuhan, capital of Hubei province in China, after 41 people developed pneumonia without a clear cause. Infections have since been reported around the world. Symptoms include fever, coughing and breathing difficulties. Throughout this questionnaire, we will refer to the disease as Coronavirus. Which, if any, of the following statements do you agree with regarding Coronavirus (COVID-19? (Please select all that apply)**

I feel well informed about the need for measures to control the spread of the outbreak personally  
I have everything I need to manage if I am self-isolated (e.g., sufficient food. etc.)

I understand the benefit of washing my hands often  
I understand the benefit of self-isolating if needed to  
I feel I can make a positive contribution to efforts to limit the spread/impact of the outbreak  
None of these  
Don't know

**LMC\_Q2. For the following few questions, we have provided you with a "Prefer not to say" option, which you can select if you do not wish to share your experiences on a particular question. Which, if any, of the following emotions have you felt as a result of the Coronavirus pandemic so far? (Please select all that apply)**

Afraid  
Panicked  
Anxious or worried  
Empathetic  
Indifferent  
Hopeful  
Hopeless  
Ashamed  
Guilt  
Loneliness  
Unprepared  
None of these  
Don't know  
Prefer not to say

**For the following question, we have provided you with both a "Not applicable" and "Prefer not to say" options, as some questions may either not apply or are of a sensitive nature. Please select the option that best applies to you. Are you worried about any of the following as a result of the Coronavirus pandemic? (Please select one option on each row)**

*Options:*

Yes  
No  
Don't know  
Not applicable  
Prefer not to say

**LMC\_Q3\_1. Financial concerns (e.g., going into debt, ability to pay bills, etc.)**

**LMC\_Q3\_2. Losing my job**

**LMC\_Q3\_3. Becoming ill with the virus**

**LMC\_Q3\_4. Being able to cope with uncertainty (e.g., not knowing what will happen)**

**LMC\_Q3\_5. Having no-one to care for me, as a result of becoming ill with the virus**

- LMC\_Q3\_6. Being unable to access my benefit payments**
- LMC\_Q3\_7. Not being able to care for friends and family, as a result of becoming ill**
- LMC\_Q3\_8. Being separated from friends and family if I have to self-isolate**
- LMC\_Q3\_9. Being separated from friends and family if they have to self-isolate**
- LMC\_Q3\_10. Having enough food to meet my / my households basic needs**
- LMC\_Q3\_11. Being vulnerable because of an existing medical condition**
- LMC\_Q3\_12. My education or career training being interrupted**
- LMC\_Q3\_13. Looking after my children if I get sick**
- LMC\_Q3\_14. Passing the coronavirus on to someone else if I became infected**
- LMC\_Q3\_15. Being vulnerable because of my age**
- LMC\_Q3\_16. Experiencing discrimination if I contract the coronavirus**
- LMC\_Q3\_17. Making my existing mental health problems worse**
- LMC\_Q3\_18. How the mental health of my child(ren) will be affected by the pandemic**

**LMC\_Q4. Still thinking about the Coronavirus...Which, if any, of the following statements apply to you? (Please select all that apply)**

- I would volunteer to help tackle the coronavirus as long as it didn't increase my risk of catching it (e.g., dropping food off to people's houses, etc.)
- I would volunteer to help tackle the coronavirus even if it increased my personal risk of catching it (e.g., dropping off food to people's houses, caring for people who are sick. etc.)
- I am worried about someone I know who is living alone and may need help during the pandemic
- I am planning to help someone I know who is living alone during the pandemic
- I am worried about someone who is particularly vulnerable (e.g., elderly, someone with a pre-existing medical condition)
- I live alone and will not have support of family or friends if I became infected
- I think tackling the Coronavirus is solely the job of Government, public services and NHS
- I believe that concern about the Coronavirus is exaggerated
- It has negatively affected how well I sleep
- I am caring for someone and worried about how they will cope if I became infected
- I am a carer and worried about how I will cope if I became infected
- None of these
- Don't know
- Prefer not to say

## Questions for Wave 2

**What is your current marital or relationship status?**

Married/In a civil partnership  
Living as Married  
Separated/Divorced  
Widowed  
Never married

**Which of these applies to you?**

Working full time  
Working part time  
Full time student  
Retired  
Unemployed  
Not working/Other

**Are you the parent/ guardian of children of any of the following ages? (Please select all that apply.)**

Not parent/ guardian  
4 years and under  
5 to 11 years  
12 to 16 years  
17 to 18 years  
18 years and under  
Over 18 years

**Children in Household (Please select all that apply.)**

0  
1  
2  
3+  
Refuse to answer

**LMC\_QA. The 2019 novel coronavirus (2019-nCoV), otherwise known as COVID-19, is an infectious disease first identified in the city of Wuhan, capital of Hubei province in China, after 41 people developed pneumonia without a clear cause. Infections have since been reported around the world. Symptoms include fever, coughing and breathing difficulties. Throughout this questionnaire, we will refer to the disease as Coronavirus. For the following question, we would like you to think about yourself, members of your household or other family members who have been affected by Coronavirus. Which, if any, of the following applies to how you have been affected by Coronavirus (COVID-19) in the past 2 weeks? (Please select all that apply)**

I have been tested for Coronavirus and had a positive result  
I have been tested for Coronavirus and had a negative result  
Someone in my household has tested positive for Coronavirus  
A family member living at a different address has tested positive for Coronavirus  
I am self-isolating with symptoms of Coronavirus  
My household is self-isolating because someone else has symptoms of Coronavirus  
A family member living at a different address is self-isolating with symptoms of Coronavirus  
As part of my current work I am working directly with individuals who have tested positive for Coronavirus  
None of these  
Don't know

**LMC\_Q1. Which, if any, of the following statements do you agree with regarding Coronavirus (COVID-19 in the past 2 weeks? (Please select all that apply)**

I feel well informed about the need for measures to control the spread of the outbreak personally  
I have everything I need to manage if I am self-isolated (e.g., sufficient food. etc.)  
I understand the benefit of washing my hands often  
I understand the benefit of self-isolating if needed to  
I feel I can make a positive contribution to efforts to limit the spread/impact of the outbreak  
None of these  
Don't know

**LMC\_Q2. For the following few questions, we have provided you with a "Prefer not to say" option, which you can select if you do not wish to share your experiences on a particular question. Which, if any, of the following emotions have you felt as a result of the Coronavirus (COVID-19) pandemic in the past 2 weeks? (Please select all that apply)**

Afraid  
Panicked  
Anxious or worried  
Empathetic  
Indifferent  
Hopeful  
Hopeless  
Ashamed  
Guilt  
Loneliness  
Unprepared  
None of these  
Don't know  
Prefer not to say

**For the following question, we have provided you with both a "Not applicable" and "Prefer not to say" options, as some questions may either not apply or are of a sensitive nature. Please select the option that best applies to you. Have you been worried about any of the following as a result of the Coronavirus (COVID-19) pandemic in the past 2 weeks? (Please select one option on each row)**

*Options:*

Yes

No

Don't know

Not applicable

Prefer not to say

**LMC\_Q3\_1. Financial concerns (e.g., going into debt, ability to pay bills, etc.)**

**LMC\_Q3\_2. Losing my job**

**LMC\_Q3\_3. Becoming ill with the virus**

**LMC\_Q3\_4. Being able to cope with uncertainty (e.g., not knowing what will happen)**

**LMC\_Q3\_5. Having no-one to care for me, as a result of becoming ill with the virus**

**LMC\_Q3\_6. Being unable to access my benefit payments**

**LMC\_Q3\_7. Not being able to care for friends and family, as a result of becoming ill**

**LMC\_Q3\_8. Being separated from friends and family**

**LMC\_Q3\_9. Being able to cope with self-isolation**

**LMC\_Q3\_10. Having enough food to meet my / my households basic needs**

**LMC\_Q3\_11. Being vulnerable because of an existing medical condition**

**LMC\_Q3\_12. My education or career training being interrupted**

**LMC\_Q3\_13. Looking after my children if I get sick**

**LMC\_Q3\_14. Passing the coronavirus on to someone else if I became infected**

**LMC\_Q3\_15. Being vulnerable because of my age**

**LMC\_Q3\_16. Experiencing discrimination if I contract the Coronavirus**

**LMC\_Q3\_17. Making my existing mental health problems worse**

**LMC\_Q3\_18. How the mental health of my child(ren) will be affected by the pandemic**

**LMC\_Q4. Still thinking about the Coronavirus...In the past 2 weeks, which, if any, of the following statements apply to you? (Please select all that apply)**

I would volunteer to help tackle the Coronavirus as long as it didn't increase my risk of catching it (e.g., dropping food off to people's houses, etc.)

I would volunteer to help tackle the Coronavirus even if it increased my personal risk of catching it (e.g., dropping off food to people's houses, caring for people who are sick. etc.)

I am worried about someone I know who is living alone and may need help during the pandemic  
I am planning to help someone I know who is living alone during the pandemic  
I am worried about someone who is particularly vulnerable (e.g., elderly, someone with a pre-existing medical condition)  
I live alone and will not have support of family or friends if I became infected  
I think tackling the Coronavirus is solely the job of Government, public services and NHS  
I believe that concern about the Coronavirus is exaggerated  
It has negatively affected how well I sleep  
I am caring for someone and worried about how they will cope if I became infected  
I am a carer and worried about how I will cope if I became infected  
None of these  
Don't know  
Prefer not to say

**LMC\_Q5. For the following question, if you have not experienced any stress related to the Coronavirus pandemic, please select the 'Not applicable' option. Overall, how well do you think you are coping with stress related to the Coronavirus (COVID-19) pandemic?**

Very well  
Fairly well  
Not very well  
Not at all well  
Don't know  
Prefer not to say  
Not applicable - I have not experienced any stress related to the Coronavirus

**LMC\_Q6. For the following question, if nothing has helped you cope with stress related to the Coronavirus pandemic, please select the 'Not applicable' option. Which, if any, of the following have helped you to cope with stress related to the Coronavirus (COVID-19) pandemic in the past 2 weeks? (Please select all that apply)**

Contacting my family (e.g., phone, video chat, etc.)  
Contacting my friends (e.g., phone, video chat, etc.)  
Contacting a mental health worker or counsellor (e.g., via phone, video chat etc.)  
Maintaining a healthy lifestyle (e.g., balanced diet, enough sleep, exercise etc.)  
Keeping up to date with relevant information (e.g., TV news, newspapers, online etc.)  
Limiting my exposure to the news about the Coronavirus  
Limiting exposure to social media (e.g., Facebook, Instagram, Snapchat, Twitter etc.)  
Contacting a support group (i.e., where members with the same issues can come together for sharing coping strategies, to feel more empowered and for a sense of community)  
Going for a walk outside  
Doing a hobby  
Volunteering to help in my local community or for the NHS  
Other

Don't know

Not applicable - Nothing has helped me to cope with stress related to the Coronavirus

**For the following question, if you do not normally do any of the following, please select the 'Not applicable' option. We have also provided you a 'Prefer not to say' option as the question might be of a sensitive nature. Which, if any, of the following have you done more or less of to cope with the stress of the Coronavirus (COVID-19) pandemic situation in the past 2 weeks, or has there been no change? (Please select one option on each row)**

*Options:*

More

Less

No change

Not applicable

Prefer not to say

**LMC\_Q7\_1. Drunk alcohol**

**LMC\_Q7\_2. Smoking (e.g., cigarettes, cigars, etc.)**

**LMC\_Q7\_3. Used illicit drugs or other substances**

**LMC\_Q7\_4. Eaten too much**

**LMC\_Q7\_5. Eaten too little**

**LBC\_Q8A. The following questions are on the topic of self-harm and suicidal thoughts, and your own personal experiences of this. We understand this can be a sensitive topic, but please remember your answers will always be treated anonymously and will never be analysed individually. We will provide you with a "Prefer not to say" option for particularly sensitive questions, which you can select if you do not wish to share your opinion or experiences on a particular question. Are you happy to continue with this section of the survey?**

Yes

No

**Have you done or experienced any of the following, as a result of the Coronavirus (COVID-19) pandemic in the past 2 weeks? (Please select one option on each row)**

*Options:*

Yes

No

Prefer not to say

**LMC\_Q8\_1. Experienced suicidal thoughts/ feelings**

**LMC\_Q8\_2. Deliberately hurt myself**

**LMC\_Q8\_3. Worried about someone close to me dying**



**How often have you done each of the following as a result of the Coronavirus (COVID-19 pandemic in the past 2 weeks? (Please select one option on each row)**

*Options:*

Once a day or more often

Nearly every day

A few times a week

Passing thoughts

Don't know

Prefer not to say

**LMC\_Q9\_1. Experienced suicidal thoughts/ feelings**

**LMC\_Q9\_2. Deliberately hurt myself**

**LMC\_Q9\_3. Worried about someone close to me dying**

### Questions for Wave 3

**What is your current marital or relationship status?**

Married/In a civil partnership  
Living as Married  
Separated/Divorced  
Widowed  
Never married

**Which of these applies to you?**

Working full time  
Working part time  
Full time student  
Retired  
Unemployed  
Not working/Other

**Are you the parent/ guardian of children of any of the following ages? (Please select all that apply.)**

Not parent/ guardian  
4 years and under  
5 to 11 years  
12 to 16 years  
17 to 18 years  
18 years and under  
Over 18 years

**Children in Household (Please select all that apply.)**

0  
1  
2  
3+  
Refuse to answer

**Which, if any, of the following best describes your current living arrangements? Please select all that apply.**

I live alone  
Living with a spouse or partner  
Living with friend(s) or housemate(s)  
Living with parent(s)  
Living with brother(s) or sister(s)  
Living with child(ren) who are over 18

Living with child(ren) who are below 18  
Living with other adult family members, e.g., Grandparents, Cousins, etc.  
Living with grandchild(ren) (by grandchildren we mean the children of your children, whether by birth, adoption, or relationship)  
Prefer not to say  
None of these

**LMC\_QA. Which, if any, of the following applies to how you have been affected by Coronavirus (COVID-19) in the past 2 weeks? (Please select all that apply)**

I have been tested for Coronavirus and had a positive result  
I have been tested for Coronavirus and had a negative result  
Someone in my household has tested positive for Coronavirus  
A family member living at a different address has tested positive for Coronavirus  
I am self-isolating with symptoms of Coronavirus  
I am self-isolating but don't have any symptoms of Coronavirus  
My household is self-isolating because someone else has symptoms of Coronavirus  
A family member living at a different address is self-isolating with symptoms of Coronavirus  
As part of my current work I am working directly with individuals who have tested positive for Coronavirus  
None of these  
Don't know

**LMC\_QBA. Which ONE, if any, of the following BEST describes your current employment since the outbreak of the Coronavirus (COVID-19)?**

I am still in employment and continue to work at my workplace (i.e., not from home)  
I was working from home before the outbreak and continue to work from home now  
I am currently working, but now from home permanently, where I didn't before the outbreak  
I have taken temporary unpaid leave  
I have been temporarily furloughed by my employer  
I have been laid off by my employer  
None of these  
Don't know

**LMC\_Q1. Which, if any, of the following statements do you agree with regarding Coronavirus (COVID-19) in the past 2 weeks? (Please select all that apply)**

I feel well informed about the need for measures to control the spread of the outbreak personally  
I have everything I need to manage if I am self-isolated (e.g., sufficient food. etc.)  
I understand the benefit of washing my hands often  
I understand the benefit of self-isolating if I needed to  
I feel I can make a positive contribution to efforts to limit the spread/impact of the outbreak  
None of these  
Don't know

**LMC\_Q2. Which, if any, of the following emotions have you felt as a result of the Coronavirus (COVID-19) pandemic in the past 2 weeks? (Please select all that apply)**

Afraid  
Panicked  
Anxious or worried  
Empathetic  
Indifferent  
Hopeful  
Hopeless  
Ashamed  
Guilt  
Loneliness  
Unprepared  
None of these  
Don't know  
Prefer not to say

**Have you been worried about any of the following as a result of the Coronavirus (COVID-19) pandemic in the past 2 weeks? (Please select one option on each row)**

*Options:*

Yes  
No  
Don't know  
Not applicable  
Prefer not to say

**LMC\_Q3\_1. Financial concerns (e.g., going into debt, ability to pay bills, etc.)**

**LMC\_Q3\_2. Losing my job**

**LMC\_Q3\_3. Becoming ill with the virus**

**LMC\_Q3\_4. Being able to cope with uncertainty (e.g., not knowing what will happen)**

**LMC\_Q3\_5. Having no-one to care for me, as a result of becoming ill with the virus**

**LMC\_Q3\_6. Being unable to access my benefit payments**

**LMC\_Q3\_7. Not being able to care for friends and family, as a result of becoming ill**

**LMC\_Q3\_8. Being separated from friends and family**

**LMC\_Q3\_9. Being able to cope with self-isolation**

**LMC\_Q3\_10. Having enough food to meet my / my households basic needs**

**LMC\_Q3\_11. Being vulnerable because of an existing medical condition**

**LMC\_Q3\_12. My education or career training being interrupted**

**LMC\_Q3\_13. Looking after my children if I get sick**

**LMC\_Q3\_14. Passing the coronavirus on to someone else if I became infected**

**LMC\_Q3\_15. Being vulnerable because of my age**

**LMC\_Q3\_16. Experiencing discrimination if I contract the Coronavirus**

**LMC\_Q3\_17. Making my existing mental health problems worse**

**LMC\_Q3\_18. How the mental health of my child(ren) will be affected by the pandemic**

**LMC\_Q4. Still thinking about the Coronavirus...In the past 2 weeks, which, if any, of the following statements apply to you? (Please select all that apply)**

I would volunteer to help tackle the Coronavirus as long as it didn't increase my risk of catching it (e.g., dropping food off to people's houses, etc.)

I would volunteer to help tackle the Coronavirus even if it increased my personal risk of catching it (e.g., dropping off food to people's houses, caring for people who are sick. etc.)

I am worried about someone I know who is living alone and may need help during the pandemic

I am planning to help someone I know who is living alone during the pandemic

I am worried about someone who is particularly vulnerable (e.g., elderly, someone with a pre-existing medical condition)

I live alone and will not have support of family or friends if I became infected

I think tackling the Coronavirus is solely the job of Government, public services and NHS

I believe that concern about the Coronavirus is exaggerated

It has negatively affected how well I sleep

I am caring for someone and worried about how they will cope if I became infected

I am a carer and worried about how I will cope if I became infected

I have experienced a loss due to COVID-19

None of these

Don't know

Prefer not to say

**LMC\_Q4A. For the following question we would like you to think about kindness in general. By kindness we mean the quality of being friendly, generous and considerate. Which, if any, of the following statements do you agree with? (Please select all that apply)**

Being kind to myself has a positive impact on my mental health

Being kind to others has a positive impact on my mental health.

When other people are kind it has a positive impact on my mental health.

The desire to be kind motivates me to be more socially active (e.g., joining groups, volunteering)

I try to make sure I make time to be kind to myself

It's important to look after my own needs as well as being kind to others

It's important that politicians value kindness

It's important that politicians prioritise kindness in policy making

It's important that politicians prioritise kindness in service provision  
Trying to be kind to too many people can sometimes feel overwhelming  
None of these  
Don't know

**LMC\_Q4B. Thinking now about the Coronavirus (COVID-19)...Which, if any, of the following statements do you agree with? (Please select all that apply)**

It's important we show kindness to key workers who are working during the pandemic  
It's important to show kindness to young people during the pandemic  
It's important to show kindness to older adults during the pandemic  
It's important to show kindness to people with underlying health conditions during the pandemic  
It's important to show kindness to people who have been bereaved during the pandemic  
It's important that we show kindness to the families and friends of people who have died in the pandemic  
It's important that we learn from this crisis in order to be more kind as a society  
It's important after the pandemic that politicians value kindness more than they did previously  
It's important that after the pandemic politicians prioritise kindness in policy making  
It's important that after the pandemic politicians prioritise kindness in service provision  
It's important to remember to be kind to ourselves in order to cope with the pandemic  
I sometimes feel overwhelmed by trying to be kind to too many people during the pandemic  
None of these  
Don't know

**LMC\_Q5. For the following question, if you have not experienced any stress related to the Coronavirus pandemic, please select the 'Not applicable' option. Overall, how well do you think you are coping with stress related to the Coronavirus (COVID-19) pandemic?**

Very well  
Fairly well  
Not very well  
Not at all well  
Don't know  
Prefer not to say  
Not applicable - I have not experienced any stress related to the Coronavirus

**LMC\_Q6. Which, if any, of the following have helped you to cope with stress related to the Coronavirus (COVID-19) pandemic in the past 2 weeks? (Please select all that apply)**

Contacting my family (e.g., phone, video chat, etc.)  
Contacting my friends (e.g., phone, video chat, etc.)  
Contacting a mental health worker or counsellor (e.g., via phone, video chat etc.)  
Maintaining a healthy lifestyle (e.g., balanced diet, enough sleep, exercise etc.)  
Keeping up to date with relevant information (e.g., TV news, newspapers, online etc.)  
Limiting my exposure to the news about the Coronavirus

Limiting exposure to social media (e.g., Facebook, Instagram, Snapchat, Twitter etc.)

Contacting a support group (i.e., where members with the same issues can come together for sharing coping strategies, to feel more empowered and for a sense of community)

Going for a walk outside

Doing a hobby

Volunteering to help in my local community or for the NHS

Other

Don't know

Not applicable - Nothing has helped me to cope with stress related to the Coronavirus

**Which, if any, of the following have you done more or less of to cope with the stress of the Coronavirus (COVID-19) pandemic situation in the past 2 weeks, or has there been no change? (Please select one option on each row)**

*Options:*

More

Less

No change

Not applicable

Prefer not to say

**LMC\_Q7\_1. Drunk alcohol**

**LMC\_Q7\_2. Smoking (e.g., cigarettes, cigars, etc.)**

**LMC\_Q7\_3. Used illicit drugs or other substances**

**LMC\_Q7\_4. Eaten too much**

**LMC\_Q7\_5. Eaten too little**

**LBC\_Q8A. The following questions are on the topic of self-harm and suicidal thoughts, and your own personal experiences of this. We understand this can be a sensitive topic, but please remember your answers will always be treated anonymously and will never be analysed individually. We will provide you with a "Prefer not to say" option for particularly sensitive questions, which you can select if you do not wish to share your opinion or experiences on a particular question. Are you happy to continue with this section of the survey?**

Yes

No

**Have you done or experienced any of the following, as a result of the Coronavirus (COVID-19) pandemic in the past 2 weeks? (Please select one option on each row)**

*Options:*

Yes

No

Prefer not to say

**LMC\_Q8\_1. Experienced suicidal thoughts/ feelings**

**LMC\_Q8\_2. Deliberately hurt myself**

**LMC\_Q8\_3. Worried about someone close to me dying**

**How often have you done each of the following as a result of the Coronavirus (COVID-19 pandemic in the past 2 weeks? (Please select one option on each row)**

*Options:*

Once a day or more often

Nearly every day

A few times a week

Passing thoughts

Don't know

Prefer not to say

**LMC\_Q9\_1. Experienced suicidal thoughts/ feelings**

**LMC\_Q9\_2. Deliberately hurt myself**

**LMC\_Q9\_3. Worried about someone close to me dying**

**LMC\_Q10. Do you have a current pre-existing mental health condition or psychiatric diagnosis?**

Yes

No

Don't know

Prefer not to say



## Questions for Wave 4

**What is your current marital or relationship status?**

Married/In a civil partnership  
Living as Married  
Separated/Divorced  
Widowed  
Never married

**Which of these applies to you?**

Working full time  
Working part time  
Full time student  
Retired  
Unemployed  
Not working/Other

**Are you the parent/ guardian of children of any of the following ages? (Please select all that apply.)**

Not parent/ guardian  
4 years and under  
5 to 11 years  
12 to 16 years  
17 to 18 years  
18 years and under  
Over 18 years

**Children in Household (Please select all that apply.)**

0  
1  
2  
3+  
Refuse to answer

**Which, if any, of the following best describes your current living arrangements? Please select all that apply.**

I live alone  
Living with a spouse or partner  
Living with friend(s) or housemate(s)  
Living with parent(s)  
Living with brother(s) or sister(s)  
Living with child(ren) who are over 18

Living with child(ren) who are below 18  
Living with other adult family members, e.g., Grandparents, Cousins, etc.  
Living with grandchild(ren) (by grandchildren we mean the children of your children, whether by birth, adoption, or relationship)  
Prefer not to say  
None of these

**LMC\_QA. Which, if any, of the following applies to how you have been affected by Coronavirus (COVID-19) in the past 2 weeks? (Please select all that apply)**

I have been tested for Coronavirus and had a positive result  
I have been tested for Coronavirus and had a negative result  
Someone in my household has tested positive for Coronavirus  
A family member living at a different address has tested positive for Coronavirus  
I am self-isolating with symptoms of Coronavirus  
I am self-isolating but don't have any symptoms of Coronavirus  
My household is self-isolating because someone else has symptoms of Coronavirus  
A family member living at a different address is self-isolating with symptoms of Coronavirus  
As part of my current work I am working directly with individuals who have tested positive for Coronavirus  
None of these  
Don't know

**LMC\_QBAB. Which ONE, if any, of the following BEST describes your current employment since the outbreak of the Coronavirus (COVID-19)?**

I am still in employment and continue to work at my workplace (i.e., not from home)  
I was working from home before the outbreak and continue to work from home now  
I am currently working but now from home permanently, whereas I didn't before the outbreak  
I have taken temporary unpaid leave  
I have been temporarily furloughed by my employer  
I have been laid off by my employer  
I have returned to work in the last 2 weeks (e.g., after being furloughed, laid off etc.)  
None of these  
Don't know

**LMC\_Q1. Which, if any, of the following statements do you agree with regarding Coronavirus (COVID-19) in the past 2 weeks? (Please select all that apply)**

I feel well informed about the need for measures to control the spread of the outbreak personally  
I have everything I need to manage if I am self-isolated (e.g., sufficient food. etc.)  
I understand the benefit of washing my hands often  
I understand the benefit of self-isolating if I needed to  
I feel I can make a positive contribution to efforts to limit the spread/impact of the outbreak

None of these

Don't know

**LMC\_Q2. For the following few questions, we have provided you with a "Prefer not to say" option, which you can select if you do not wish to share your experiences on a particular question. Which, if any, of the following emotions have you felt as a result of the Coronavirus (COVID-19) pandemic in the past 2 weeks? (Please select all that apply)**

Afraid

Panicked

Anxious or worried

Empathetic

Indifferent

Hopeful

Hopeless

Ashamed

Guilt

Loneliness

Unprepared

None of these

Don't know

Prefer not to say

**For the following question, we have provided you with both a "Not applicable" and "Prefer not to say" options, as some questions may either not apply or are of a sensitive nature. Please select the option that best applies to you. Have you been worried about any of the following as a result of the Coronavirus (COVID-19) pandemic in the past 2 weeks? (Please select one option on each row)**

*Options:*

Yes

No

Don't know

Not applicable

Prefer not to say

Refused

**LMC\_Q3\_1. Financial concerns (e.g., going into debt, ability to pay bills, etc.)**

**LMC\_Q3\_2. Losing my job**

**LMC\_Q3\_3. Becoming ill with the virus**

**LMC\_Q3\_4. Being able to cope with uncertainty (e.g., not knowing what will happen)**

**LMC\_Q3\_5. Having no-one to care for me, because of becoming ill with the virus**

**LMC\_Q3\_6. Being unable to access my benefit payments**

**LMC\_Q3\_7. Not being able to care for friends and family, as a result of becoming ill**

**LMC\_Q3\_8. Being separated from friends and family**

**LMC\_Q3\_9. Being able to cope with self-isolation**

**LMC\_Q3\_10. Having enough food to meet my / my household's basic needs**

**LMC\_Q3\_11. Being vulnerable because of an existing medical condition**

**LMC\_Q3\_12. My education or career training being interrupted**

**LMC\_Q3\_13. Looking after my children if I get sick**

**LMC\_Q3\_14. Passing the coronavirus on to someone else if I became infected**

**LMC\_Q3\_15. Being vulnerable because of my age**

**LMC\_Q3\_16. Experiencing discrimination if I contract the Coronavirus**

**LMC\_Q3\_17. Making my existing mental health problems worse**

**LMC\_Q3\_18. How the mental health of my child(ren) will be affected by the pandemic**

**LMC\_Q4. Still thinking about the Coronavirus...In the past 2 weeks, which, if any, of the following statements apply to you? (Please select all that apply)**

I would volunteer to help tackle the Coronavirus as long as it didn't increase my risk of catching it (e.g., dropping food off to people's houses, etc.)

I would volunteer to help tackle the Coronavirus even if it increased my personal risk of catching it (e.g., dropping off food to people's houses, caring for people who are sick, etc.)

I am worried about someone I know who is living alone and may need help during the pandemic

I am planning to help someone I know who is living alone during the pandemic

I am worried about someone who is particularly vulnerable (e.g., elderly, someone with a pre-existing medical condition)

I live alone and will not have support of family or friends if I became infected

I think tackling the Coronavirus is solely the job of Government, public services and NHS

I believe that concern about the Coronavirus is exaggerated

It has negatively affected how well I sleep

I am caring for someone and worried about how they will cope if I became infected

I am a carer and worried about how I will cope if I became infected

I have experienced a loss due to COVID-19

None of these

Don't know

Prefer not to say

**LMC\_Q5. For the following question, if you have not experienced any stress related to the Coronavirus pandemic, please select the 'Not applicable' option. Overall, how well do you think you are coping with stress related to the Coronavirus (COVID-19) pandemic?**

Very well

Fairly well  
 Not very well  
 Not at all well  
 Don't know  
 Prefer not to say  
 Not applicable - I have not experienced any stress related to the Coronavirus

**LMC\_Q6. For the following question, if nothing has helped you cope with stress related to the Coronavirus pandemic, please select the 'Not applicable' option. Which, if any, of the following have helped you to cope with stress related to the Coronavirus (COVID-19) pandemic in the past 2 weeks? (Please select all that apply)**

Contacting my family (e.g., phone, video chat, etc.)  
 Contacting my friends (e.g., phone, video chat, etc.)  
 Contacting a mental health worker or counsellor (e.g., via phone, video chat etc.)  
 Maintaining a healthy lifestyle (e.g., balanced diet, enough sleep, exercise etc.)  
 Keeping up to date with relevant information (e.g., TV news, newspapers, online etc.)  
 Limiting my exposure to the news about the Coronavirus  
 Limiting exposure to social media (e.g., Facebook, Instagram, Snapchat, Twitter etc.)  
 Contacting a support group (i.e., where members with the same issues can come together for sharing coping strategies, to feel more empowered and for a sense of community)  
 Going for a walk outside  
 Doing a hobby  
 Volunteering to help in my local community or for the NHS  
 Being able to visit green spaces (e.g., outdoor spaces, parks etc.)  
 Other  
 Don't know  
 Not applicable - Nothing has helped me to cope with stress related to the Coronavirus

**For the following question, if you do not normally do any of the following, please select the 'Not applicable' option. We have also provided you a 'Prefer not to say' option as the question might be of a sensitive nature. Which, if any, of the following have you done more or less of to cope with the stress of the Coronavirus (COVID-19) pandemic situation in the past 2 weeks, or has there been no change? (Please select one option on each row)**

*Options:*  
 More  
 Less  
 No change  
 Not applicable  
 Prefer not to say

**LMC\_Q7\_1. Drunk alcohol**

**LMC\_Q7\_2. Smoking (e.g., cigarettes, cigars, etc.)**

**LMC\_Q7\_3. Used illicit drugs or other substances**

**LMC\_Q7\_4. Eaten too much**

**LMC\_Q7\_5. Eaten too little**

**LBC\_Q8A. The following questions are on the topic of self-harm and suicidal thoughts, and your own personal experiences of this. We understand this can be a sensitive topic, but please remember your answers will always be treated anonymously and will never be analysed individually. We will provide you with a "Prefer not to say" option for particularly sensitive questions, which you can select if you do not wish to share your opinion or experiences on a particular question. Are you happy to continue with this section of the survey?**

Yes

No

**Have you done or experienced any of the following, as a result of the Coronavirus (COVID-19) pandemic in the past 2 weeks?**

*Options:*

Yes

No

Prefer not to say

**LMC\_Q8\_1. Experienced suicidal thoughts/ feelings**

**LMC\_Q8\_2. Deliberately hurt myself**

**LMC\_Q8\_3. Worried about someone close to me dying**

**How often have you done each of the following as a result of the Coronavirus (COVID-19) pandemic in the past 2 weeks? (Please select one option on each row)**

*Options:*

Once a day or more often

Nearly every day

A few times a week

Passing thoughts

Don't know

Prefer not to say

**LMC\_Q9\_1. Experienced suicidal thoughts/ feelings**

**LMC\_Q9\_2. Deliberately hurt myself**

**LMC\_Q9\_3. Worried about someone close to me dying**

**LMC\_Q10. For the following questions, please remember that your answers are always treated confidentially and are never analysed individually. We have provided you with a "Prefer not to say"**

**option if you would rather not share your experiences. Do you have a current pre-existing mental health condition or psychiatric diagnosis?**

Yes

No

Don't know

Prefer not to say

Refused
